# Supplementary material for: Cervical-Vaginal Mucin in Fertility Assessment: CA125 as a Predictor of the Fertile Phase of the Normal Menstrual Cycle
Source: MDPI journal article supplement (doi:10.3390/medicina56060304), 2020-06-20
Supplement: s1 [file s1]

Table S1. Characteristics of Cycles

Length in days, age, ca125.fsd = CA125 level on FSD (Fertile Start Day), ca125.max = maximum CA125 level.

|    | subject | cycle | length | age | ca125.fsd | ca125.max | fsd |
|----|---------|-------|--------|-----|-----------|-----------|-----|
| 1  | PT1.1   | 1     | 24     | 38  | 204       | 869       | -5  |
| 2  | PT1.2   | 2     | 26     | 38  | 217       | 513       | -4  |
| 3  | PT2     | 1     | 29     | 39  | 44        | 931       | -3  |
| 4  | PT10    | 1     | 29     | 25  | 84        | 84        | -4  |
| 5  | PT13    | 1     | 31     | 30  | 13        | 87        | -7  |
| 6  | PT14    | 1     | 30     | 31  | 4         | 226       | -5  |
| 7  | PT15    | 1     | 21     | 34  | 12        | 24        | -3  |
| 8  | PT16.1  | 1     | 35     | 30  | 28        | 132       | -7  |
| 9  | PT16.2  | 2     | 28     | 30  | 38        | 429       | -3  |
| 10 | PT17.1  | 1     | 30     | 25  | 10        | 145       | -3  |
| 11 | PT17.2  | 2     | 32     | 25  | 5         | 42        | -3  |
| 12 | PT11.1  | 2     | 34     | 23  | 9         | 203       | -5  |
| 13 | PT11.2  | 3     | 30     | 23  | 8         | 5740      | -5  |
| 14 | PT18    | 1     | 33     | 30  | 26        | 43        | -9  |
| 15 | PT21.1  | 1     | 24     | 30  | 50        | 116       | -3  |
| 16 | PT21.2  | 2     | 27     | 30  | 167       | 451       | -4  |
| 17 | PT22    | 1     | 28     | 23  | 4         | 4         | -2  |
| 18 | PT24    | 1     | 30     | 35  | 10        | 99        | -11 |
| 19 | PT26    | 1     | 26     | 31  | 9         | 2390      | -4  |
| 20 | PT27    | 1     | 27     | 34  | 44        | 67        | -6  |

Table S2.

### Estimated Probabilities of Conception (PoC)

|    | fsd | Daily PoC | PoC   |
|----|-----|-----------|-------|
| 1  | -8  | 0.003     | 0.000 |
| 2  | -7  | 0.014     | 0.003 |
| 3  | -6  | 0.027     | 0.017 |
| 4  | -5  | 0.068     | 0.042 |
| 5  | -4  | 0.176     | 0.100 |
| 6  | -3  | 0.237     | 0.212 |
| 7  | -2  | 0.255     | 0.268 |
| 8  | -1  | 0.212     | 0.276 |
| 9  | 0   | 0.103     | 0.277 |
| 10 | 1   | 0.008     | 0.277 |
| 11 | 2   | 0.035     | 0.277 |
